# Supplementary material for: Molecular mechanisms of CeO2 nanomaterials improving tomato yield, fruit quality, and postharvest storage performance
Source: Royal Society of Chemistry journal article supplement (doi:10.1039/d2en00783e), 2022-01-01
Supplement: d2en00783e1.pdf [file d2en00783e1.pdf]

## Supporting information

### **Molecular Mechanisms of CeO<sub>2</sub> Nanomaterials Improving Tomato Yield, Fruit Quality, and Postharvest Storage Performance**

Yan Feng<sup>ab</sup>, Chuanxi Wang<sup>ab</sup>, Feiran Chen<sup>ab</sup>, Xuesong Cao<sup>ab</sup>, Jing Wang<sup>ab</sup>, Le Yue<sup>\*ab</sup>,  
Zhenyu Wang<sup>ab</sup>

*<sup>a</sup> Institute of Environmental Processes and Pollution Control and School of Environment and  
Civil Engineering, Jiangnan University, Wuxi 214122, China.*

*<sup>b</sup> Jiangsu Engineering Laboratory for Biomass Energy and Carbon Reduction Technology,  
Wuxi 214122, China.*

\*Corresponding author:

*Tel.: +86 0510 85911911*

*E-mail address: leyue@jiangnan.edu.cn (Dr. Le Yue)*

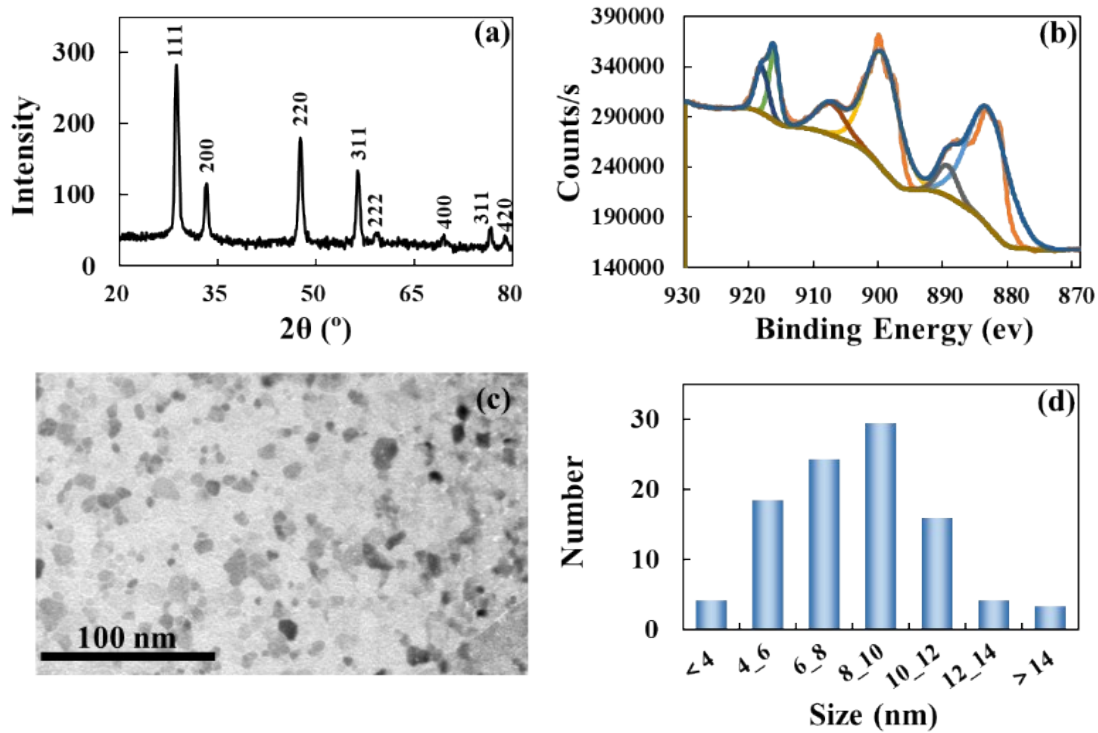

**Fig. S1** XRD analysis (a), XPS measurement (b), TEM image (c) and size distribution (d) of CeO<sub>2</sub> NMs.

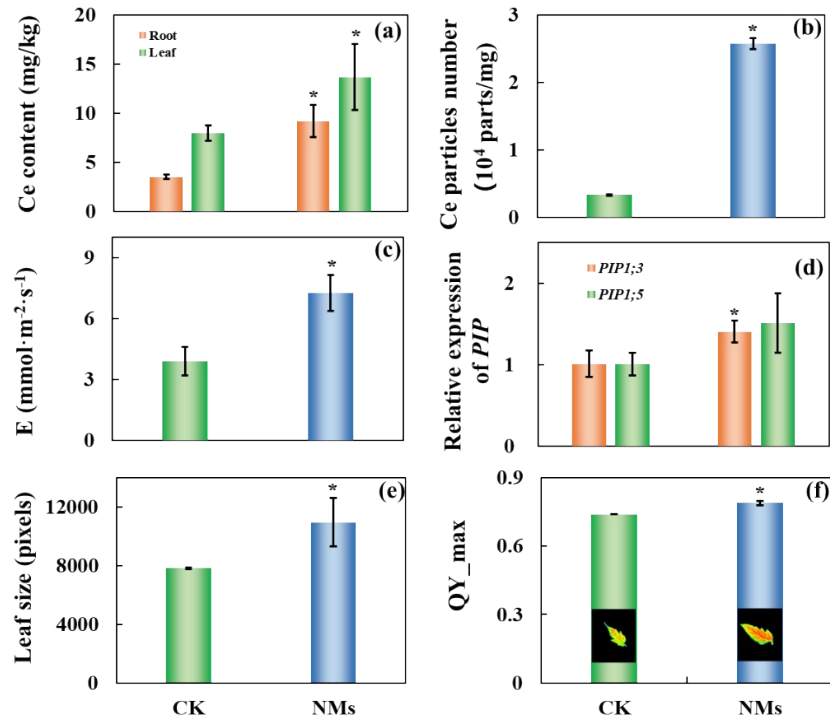

**Fig. S2** Ce content in roots and leaves (a), Ce particles number in leaves (b), transpiration rate (E) (c), relative expression of *PIP* (c), leaf size (e) and photosystem II photochemistry (QY\_max) (d). The significant differences between control and CeO<sub>2</sub> NMs are marked with “\*” ( $p < 0.05$ ). Values are mean  $\pm$  standard deviation (t test, n = 5).

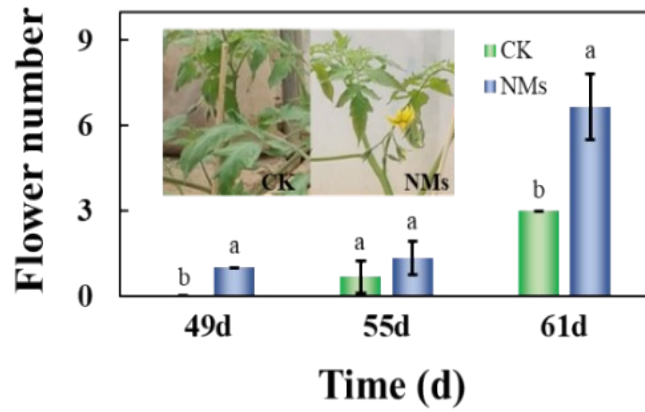

**Fig. S3** Phenotype of early flowering and flower number in control and CeO<sub>2</sub> NMs. Different letters indicate significant differences among treatments ( $p < 0.05$ ). Values are mean  $\pm$  standard deviation (t test,  $n = 5$ ).

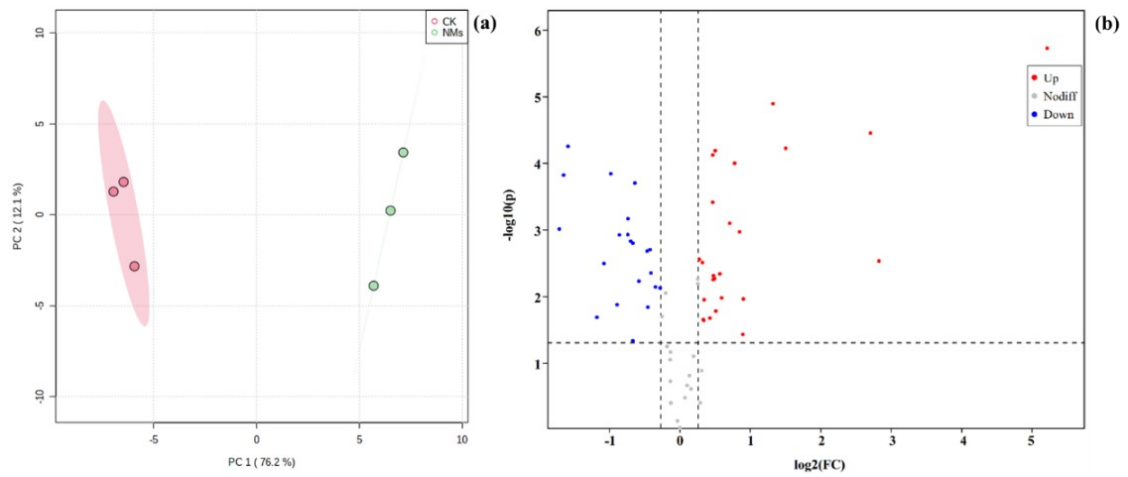

**Fig. S4** Partial least squares-discriminate analysis score plots of profiles (a), and volcano plot metabolites (b) of tomato fruits between un-exposed control and CeO<sub>2</sub> NMs.

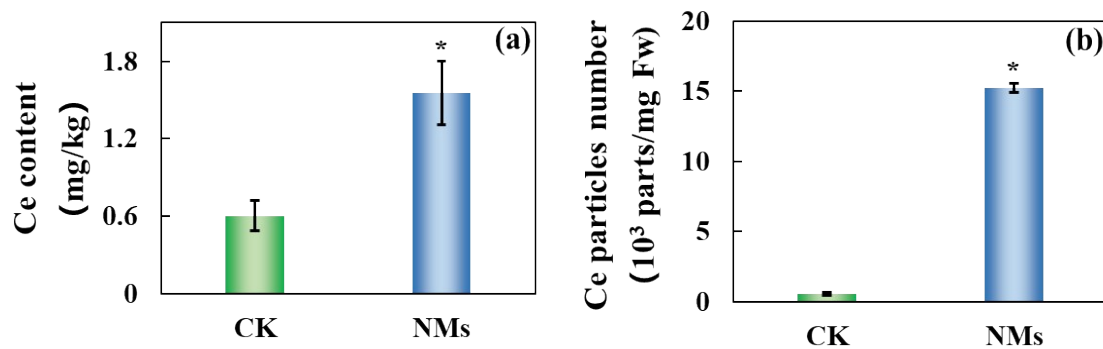

**Fig. S5** Ce content (a) and Ce particles number (b) in tomato fruit. The significant differences between control and CeO<sub>2</sub> NMs are marked with “\*” ( $p < 0.05$ ). Values are mean  $\pm$  standard deviation (t test,  $n = 5$ ).

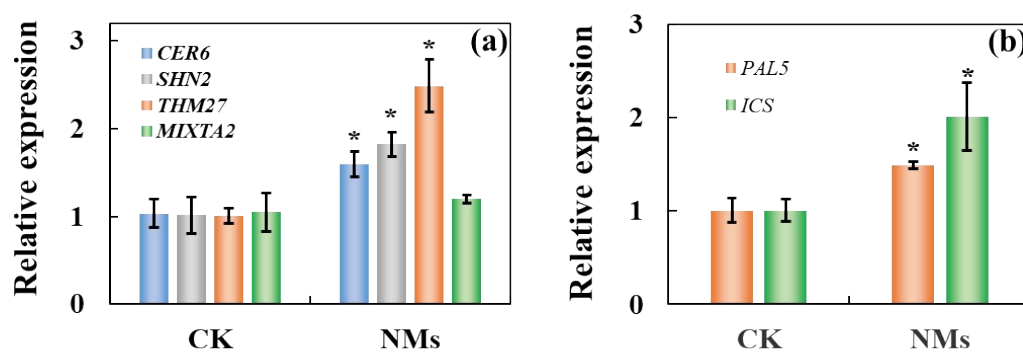

**Fig. S6** Relative expressions of waxy layer synthesis genes (*CER6*, *SHN2*, *THM27* and *MIXTA*) (a) and salicylic acid synthesis genes (*PAL5* and *ICS*) (b). The significant differences between control and CeO<sub>2</sub> NMs are marked with “\*” ( $p < 0.05$ ). Values are mean  $\pm$  standard deviation (t test, n = 5).

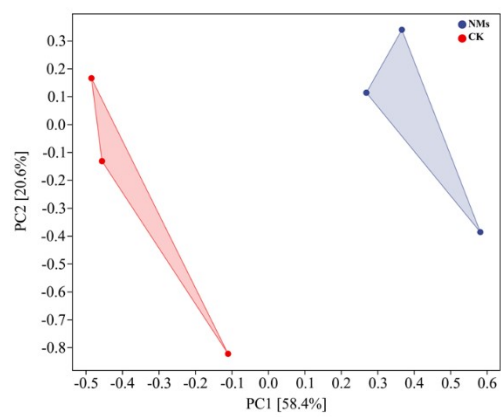

**Fig. S7** Principal coordinates analysis in postharvest soil upon CeO<sub>2</sub> NM exposure as compared to un-exposed control.

**Table S1** The properties of soil used in this research.

| pH  | Total carbon<br>(g kg <sup>-1</sup> ) | Total nitrogen<br>(g kg <sup>-1</sup> ) | Ce<br>Content<br>(g kg <sup>-1</sup> ) | Available<br>phosphorus<br>(g kg <sup>-1</sup> ) | Available<br>potassium<br>(g kg <sup>-1</sup> ) |
|-----|---------------------------------------|-----------------------------------------|----------------------------------------|--------------------------------------------------|-------------------------------------------------|
| 7.5 | 18.7                                  | 1.9                                     | 0.086                                  | 0.1                                              | 0.5                                             |

**Table S2** Primer sequences for qRT-PCR.

| Gene          | Primer  | Sequence (5' to 3')        |
|---------------|---------|----------------------------|
| <i>Actin</i>  | Forward | ATGATAACTCGACGGATCGC       |
|               | Reverse | CTTGGATGTGGTAGCCGT         |
| <i>PIP1;3</i> | Forward | TTAACAAGACGAGGCATGGGA      |
|               | Reverse | AAACAACAGCACCAGACAGGG      |
| <i>PIP1;5</i> | Forward | TATCTGTCTTTAAACAATGGGATTCT |
|               | Reverse | GAACCTTCATTGATAAGGTACATTAC |
| <i>SPS</i>    | Forward | CGGTGGATGGCAAACG           |
|               | Reverse | GGCAATCGGCCTCTGGT          |
| <i>SFT</i>    | Forward | CACCGATATTCCAGCTACCA       |
|               | Reverse | TGTTTGCCGACCTAATTGTC       |
| <i>LeSUT1</i> | Forward | TTCCATAGCTGCTGGTGTTC       |
|               | Reverse | TACCAGAAATGGGTCCACAA       |
| <i>LeSUT2</i> | Forward | CCTACAGCGTCCCTTTCTCT       |
|               | Reverse | GGATACAACCATCTGAGGTACAA    |
| <i>PIF4</i>   | Forward | GGCTTAGGTTACATACAG         |
|               | Reverse | TGATGGTGTCTGTTGTCTC        |
| <i>PAL5</i>   | Forward | AACAGCAACATTACCCCGTGTT     |
|               | Reverse | GCAATGTATGACAACGGGACAA     |
| CER6          | Forward | ACAAGAAGATCCACAAGGGAAAGT   |
|               | Reverse | CGGACCGATCGTAGTGATGTT      |
| SHN2          | Forward | ATGCAAAGCTGAGGAAATGTTG     |
|               | Reverse | GATGTTTTTTGCCACACTCCAA     |
| THM27         | Forward | GTAAAGATTGCAGTTGTGGAAGTGA  |
|               | Reverse | TTCAAGCCCCAAAAGTCATAACC    |
| MIXTA2        | Forward | GCGAGCGCTAGTGCTGGTAT       |
|               | Reverse | TAATATGTTGCGCATTTTCGAAA    |
| <i>ICS</i>    | Forward | TCATTAGACGATTGGCGTGCTA     |
|               | Reverse | GCTGTTGCATCAAATCGGATT      |



**Table S3** Zeta potential and hydrodynamic diameter of CeO<sub>2</sub> NMs in deionized water.

Values are mean  $\pm$  standard deviation (t test, n = 5).

| NMs                                    | Zeta potential (mV) | Hydrodynamic diameter (nm) |
|----------------------------------------|---------------------|----------------------------|
| 50 mg L <sup>-1</sup> CeO <sub>2</sub> | 17.4 $\pm$ 0.5      | 131.5 $\pm$ 3.2            |

**Table S4** Elemental concentration (mg kg<sup>-1</sup>) in tomato root and leaf. The significant differences between control and CeO<sub>2</sub> NMs are marked with “\*” ( $p < 0.05$ ). Values

are mean  $\pm$  standard deviation (t test, n = 5).

|      |     | Elemental concentration (mg kg <sup>-1</sup> ) |         |         |         |         |          |        |         |       |      |      |
|------|-----|------------------------------------------------|---------|---------|---------|---------|----------|--------|---------|-------|------|------|
|      |     | Na                                             | Mg      | P       | S       | K       | Ca       | Mn     | Fe      | Cu    | Zn   | Mo   |
| Root | CK  | 11473.5                                        | 3309.0  | 2629.4  | 3692.9  | 2041.1  | 8511.6   | 167.7  | 1552.7  | 15.3  | 39.2 | 0.8  |
|      | NMs | 11709.27*                                      | 4663.9* | 4348.8* | 5829.1* | 2570.6* | 9441.6*  | 377.2* | 4367.1* | 21.5* | 34.7 | 1.5* |
| Leaf | CK  | 9241.2                                         | 4204.7  | 7480.1  | 2262.6  | 13528.9 | 11243.9  | 227.8  | 1381.7  | 11.1  | 31.2 | 1.0  |
|      | NMs | 11866.9*                                       | 45593.8 | 8231.1* | 2410.5* | 14969.7 | 18030.8* | 267.8* | 2061.7* | 13.5* | 35.2 | 1.1  |

**Table S5** Relative content of metabolites in tomato leaves altered by CeO<sub>2</sub> NMs. The significant differences between control and CeO<sub>2</sub> NMs are marked with “\*” ( $p < 0.05$ ).

Values are mean  $\pm$  standard deviation (t test, n = 5).

| Metabolites  | CK            | NMs            |
|--------------|---------------|----------------|
| Serine       | 269729599.4   | 315286363.0    |
| Leucine      | 1108489665.0  | 1291215185.0   |
| Alanine      | 10393409.9    | 13550901.8*    |
| Aspartate    | 44558883.9    | 82056517.2     |
| Threonine    | 65792673.5    | 66842905.5     |
| Tyrosine     | 38736469.6    | 31728401.6     |
| Tryptophane  | 1501767.2     | 1179298.6      |
| Arginine     | 17850356.6    | 22565715.9*    |
| Glutamine    | 181122916.9   | 489312983.2*   |
| Glutamate    | 811434449.6   | 783386400.4    |
| Citrulline   | 27321339.9    | 38954250.1*    |
| Proline      | 391525319.6   | 1260413970.0*  |
| Caffeic acid | 498700100.0   | 768801796.1*   |
| Malic acid   | 10299664010.0 | 13138488670.0* |
| Citric acid  | 1154445353.0  | 1280078645.0*  |

**Table S6** Relative content of main metabolites in tomato fruits altered by CeO<sub>2</sub> NMs.

The significant differences between control and CeO<sub>2</sub> NMs are marked with “\*” ( $p < 0.05$ ). Values are mean  $\pm$  standard deviation (t test, n = 5).

| Metabolites     | CK           | NMs           |
|-----------------|--------------|---------------|
| L-Malic acid    | 54740066.8   | 155198564.5*  |
| Quercetin       | 4644754.6    | 22509350.3*   |
| Fructose        | 1239063191.0 | 2428121936.0* |
| Ascorbic acid   | 43501587.2   | 394332653.5*  |
| Coumaric acid   | 1494851267.0 | 3669602269.0* |
| L-Phenylalanine | 16543050.2   | 24252566.1*   |

**Table S7** Nutrient element concentration (mg kg<sup>-1</sup>) in tomato fruits as affected by CeO<sub>2</sub> NMs. The significant differences between control and CeO<sub>2</sub> NMs are marked with “\*” ( $p < 0.05$ ). Values are mean  $\pm$  standard deviation (t test, n = 5).

|       |     | Elemental concentration (mg kg <sup>-1</sup> ) |          |        |      |       |
|-------|-----|------------------------------------------------|----------|--------|------|-------|
|       |     | Na                                             | K        | Fe     | Cu   | Zn    |
| Fruit | CK  | 1624.1                                         | 24504.4  | 109.6  | 5.4  | 15.7  |
|       | NMs | 2352.7*                                        | 34627.0* | 145.4* | 6.2* | 18.6* |

**Table S8** Relative content of changed metabolites involved in salicylic acid metabolic pathways of tomato fruits by CeO<sub>2</sub> NMs. The significant differences between control and CeO<sub>2</sub> NMs are marked with “\*” ( $p < 0.05$ ). Values are mean  $\pm$  standard deviation

(t test, n = 5).

| <b>Metabolites</b> | <b>CK</b>    | <b>NMs</b>    |
|--------------------|--------------|---------------|
| Glutamate          | 3154016749.0 | 5413813957.0* |
| L-Phenylalanine    | 1494858126.0 | 3794122207.0* |
| Salicylic acid     | 25056885.2   | 51432736.6*   |
